# Supplementary material
Source: Royal Society of Chemistry journal article supplement (doi:10.1039/d6cp00360e)
Supplement: d6cp00360e1.pdf [file d6cp00360e1.pdf]

## Supporting Information

### Towards Efficient Nitrite-to-Ammonia Conversion: DFT-Guided Design of Single-Atom Catalysts on Defective Boron Phosphide

AoXue Hu<sup>a</sup>, Zhepei Yan<sup>a</sup>, Yongfan Zhang<sup>a</sup>, Shuping Huang<sup>a,\*</sup>, Jiehua Hu<sup>b\*</sup>

<sup>a</sup> College of Chemistry, Fujian Provincial Key Laboratory of Electrochemical Energy Storage  
Materials, Fuzhou University, Fuzhou, 350116, China

<sup>b</sup> School of Marine Biology, Xiamen Ocean Vocational College, Applied Technology Engineering  
Center of Fujian Provincial Higher Education for Marine Resource Protection and Ecological  
Governance, Xiamen 361100, China

\*Corresponding authors

E-mail addresses: huangshp@fzu.edu.cn(S. Huang), pthjh1027@163.com (J. Hu)

## 1. The details of the adsorption energy calculation of $\text{NO}_2^-$

To avoid direct calculation of the energy of the charged ion  $\text{NO}_2^-$ , the energy of the nitrite ion was derived from the thermodynamic cycle using the neutral gaseous  $\text{HNO}_2$  as a reference (Fig. S1).

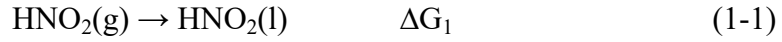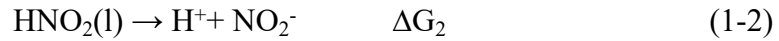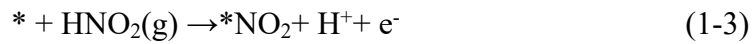

where \* indicates the substrate.

The adsorption of  $\text{NO}_2^-$  on the substrate can be described as:

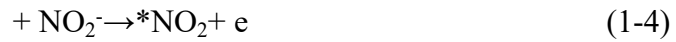

Accordingly, the approximate Gibbs free energy change of nitrate adsorbed on the electrode surface in aqueous solution ( $\Delta G_{* \text{NO}_2^-}$ ) is as follows:

$$\Delta G_{* \text{NO}_2^-} = G_{* \text{NO}_2} - G_* - G_{\text{HNO}_2(\text{g})} + 0.5G_{\text{H}_2} + \Delta G_{\text{correct}} \quad (1-5)$$

$$\Delta G_{\text{correct}} = -\Delta G_1 - \Delta G_2 = -0.007 \text{ eV} \quad (1-6)$$

$$\Delta G_{* \text{NO}_2^-} = G_{* \text{NO}_2} - G_* - G_{\text{HNO}_2(\text{g})} + 0.5G_{\text{H}_2} - 0.007 \quad (1-7)$$

The Gibbs free energy of  $\text{NO}_2$  adsorbed on the catalyst,  $\text{H}_2$ , and  $\text{HNO}_2$  gas phase molecules, and the catalyst are shown by the symbols  $G_{* \text{NO}_2}$ ,  $G_{\text{H}_2}$ ,  $G_{\text{HNO}_2(\text{g})}$ , and  $G_*$ , respectively. The CRC Handbook of Chemistry and Physics[1] states that  $\Delta G_{\text{correct}}$  is equal to -0.007 eV.

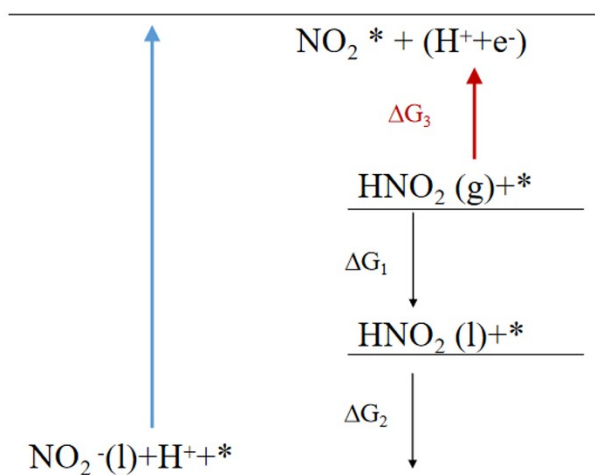

Fig. S1. The thermodynamic cycle for finding the energy of the nitrite ion.

## 2. The total reaction and elementary reactions of nitrite reduction to ammonia

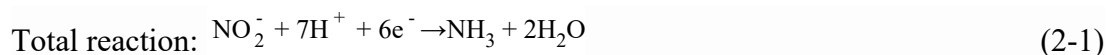

Elementary reactions:

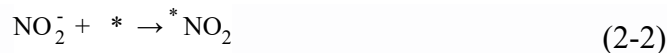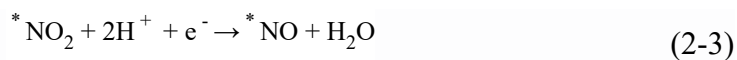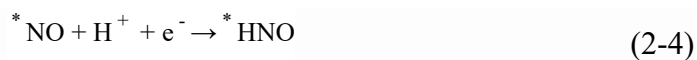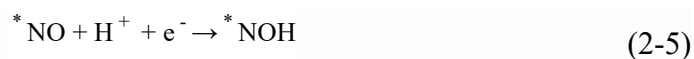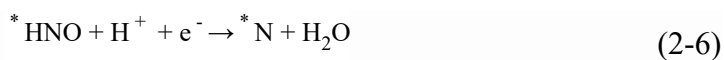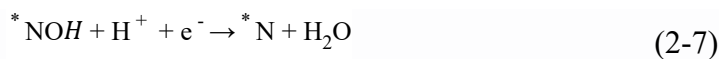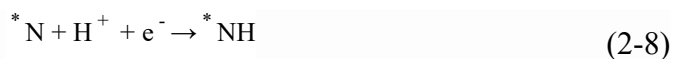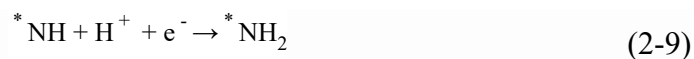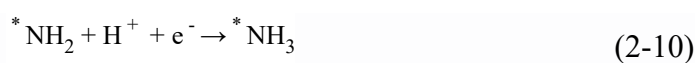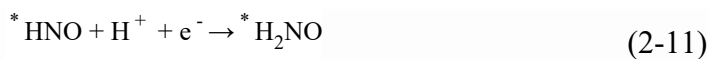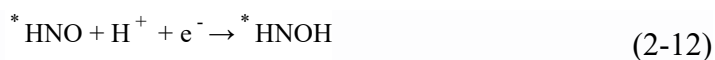

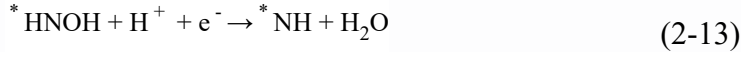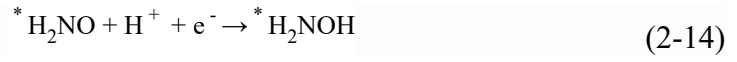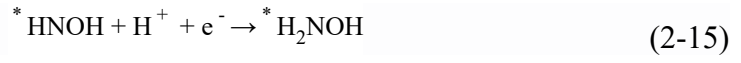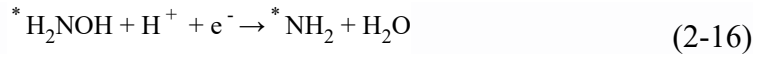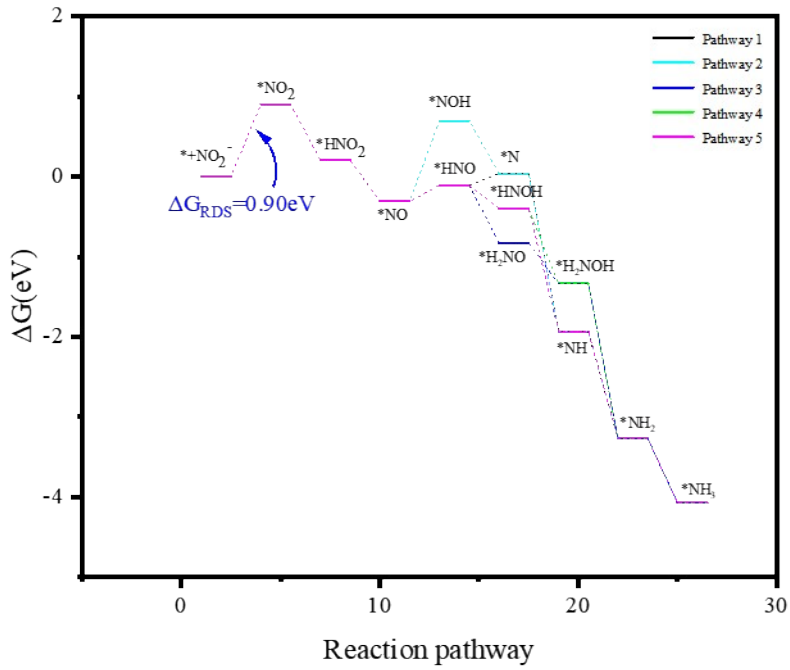

Fig. S2. Plots of the Gibbs free energy changes of the  $\text{NO}_2\text{RR}$  on BP.

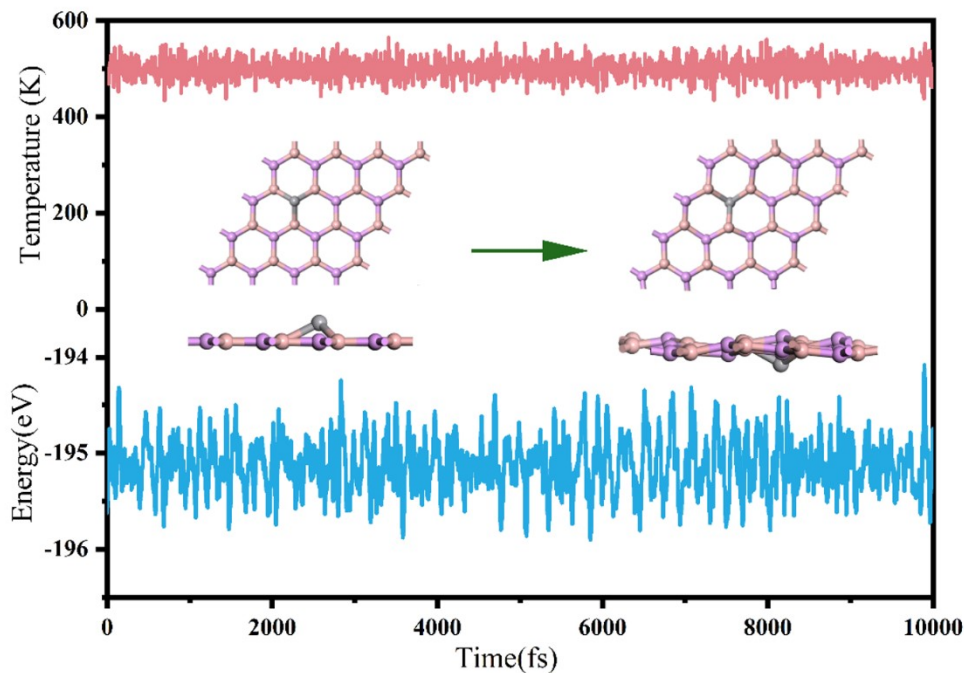

Fig. S3. The total energy fluctuations and temperature fluctuations from 0 to 10 ps of V-B<sub>3</sub> during AIMD at 500K.

Table S1. The formation energies ( $E_f$ , eV) and solvation potentials ( $U_{\text{diss}}$ , V) of 17 M-B<sub>3</sub> configurations and M-P<sub>3</sub> configurations.

| M-B <sub>3</sub> | $E_f$ | $U_{\text{diss}}$ | M-B <sub>3</sub> | $E_f$ | $U_{\text{diss}}$ | M-B <sub>3</sub> | $E_f$ | $U_{\text{diss}}$ |
|------------------|-------|-------------------|------------------|-------|-------------------|------------------|-------|-------------------|
| V                | -1.20 | 1.21              | Nb               | -1.47 | 0.33              | Ta               | -1.09 | 0.68              |
| Cr               | -1.58 | 1.64              | Mo               | -1.13 | 1.02              | W                | -0.46 | 0.95              |
| Mn               | -2.11 | 1.75              | Ru               | -2.72 | 2.94              | Re               | -1.31 | 1.49              |
| Fe               | -1.90 | 2.16              | Rh               | -4.04 | 3.88              | Os               | -2.27 | 1.39              |
| Co               | -2.70 | 2.66              | Pd               | -3.35 | 3.67              | Ir               | -4.05 | 3.33              |
| Ni               | -2.14 | 2.36              |                  |       |                   | Pt               | -4.09 | 4.49              |
| M-P <sub>3</sub> | $E_f$ | $U_{\text{diss}}$ | M-P <sub>3</sub> | $E_f$ | $U_{\text{diss}}$ | M-P <sub>3</sub> | $E_f$ | $U_{\text{diss}}$ |
| V                | -1.84 | 1.53              | Nb               | -1.48 | 0.33              | Ta               | -0.55 | 0.5               |
| Cr               | -1.71 | 1.71              | Mo               | -0.97 | 0.96              | W                | 0.17  | 0.74              |
| Mn               | -1.45 | 1.41              | Ru               | -1.91 | 2.54              | Re               | -0.34 | 1.16              |
| Fe               | -1.44 | 1.93              | Rh               | -2.3  | 3.01              | Os               | -1.06 | 1.24              |
| Co               | -1.74 | 2.18              | Pd               | -1.86 | 2.92              | Ir               | -1.93 | 2.62              |
| Ni               | -1.58 | 2.08              |                  |       |                   | Pt               | -2.28 | 3.59              |

Table S2. Adsorption energies (eV) of three adsorption models for NO<sub>2</sub><sup>-</sup>.

| *NO <sub>2</sub> <sup>-</sup> | N-end | O-end | NO-side |
|-------------------------------|-------|-------|---------|
| V-B <sub>3</sub>              | \     | -1.46 | -1.65   |
| Cr-B <sub>3</sub>             | \     | -0.83 | -0.92   |
| Mn-B <sub>3</sub>             | \     | -0.89 | -0.88   |
| Fe-B <sub>3</sub>             | \     | -0.73 | -0.88   |
| Co-B <sub>3</sub>             | \     | -0.38 | -0.37   |
| Ni-B <sub>3</sub>             | -1.03 | -0.98 | -0.89   |
| Nb-B <sub>3</sub>             | \     | -1.39 | -1.61   |
| Mo-B <sub>3</sub>             | \     | -1.15 | -1.34   |
| Ru-B <sub>3</sub>             | -0.71 | -0.40 | \       |
| Rh-B <sub>3</sub>             | 0.09  | 0.15  | \       |
| Pd-B <sub>3</sub>             | -0.43 | -0.68 | \       |
| Ta-B <sub>3</sub>             | \     | -1.69 | -1.80   |
| W-B <sub>3</sub>              | \     | -1.69 | -1.69   |
| Re-B <sub>3</sub>             | \     | -0.96 | -1.11   |
| Os-B <sub>3</sub>             | -0.89 | -0.59 | \       |
| Ir-B <sub>3</sub>             | -0.14 | -0.15 | \       |
| Pt-B <sub>3</sub>             | -0.45 | -0.79 | \       |

Table S3. Adsorption energies (eV) of three adsorption models for NO.

| $\Delta G^*_{NO}$ | N-end | O-end | NO-side |
|-------------------|-------|-------|---------|
| V-B <sub>3</sub>  | -2.52 | -1.51 | -2.37   |
| Cr-B <sub>3</sub> | -2.83 | -0.78 | -1.89   |
| Mn-B <sub>3</sub> | -2.37 | -1.05 | \       |
| Fe-B <sub>3</sub> | -2.45 | -1.17 | \       |
| Co-B <sub>3</sub> | -1.68 | -0.64 | \       |
| Ni-B <sub>3</sub> | -1.70 | -0.82 | -1.21   |
| Nb-B <sub>3</sub> | -2.06 | -1.22 | -2.17   |
| Mo-B <sub>3</sub> | -3.25 | -2.24 | -2.54   |
| Ru-B <sub>3</sub> | -2.28 | -0.80 | \       |
| Rh-B <sub>3</sub> | -1.01 | -0.08 | \       |
| Pd-B <sub>3</sub> | -1.04 | -0.41 | \       |
| Ta-B <sub>3</sub> | -2.27 | -1.45 | -2.32   |
| W-B <sub>3</sub>  | -3.38 | -1.39 | -2.45   |
| Re-B <sub>3</sub> | -3.04 | -1.08 | -2.43   |
| Os-B <sub>3</sub> | -2.56 | -0.89 | \       |
| Ir-B <sub>3</sub> | -1.25 | -0.25 | \       |
| Pt-B <sub>3</sub> | -1.18 | -0.35 | \       |

Table S4. Adsorption energies (eV) of H atom on M-B<sub>3</sub>.

|                   | $\Delta G^*_{H}$ |                   | $\Delta G^*_{H}$ |                   | $\Delta G^*_{H}$ |
|-------------------|------------------|-------------------|------------------|-------------------|------------------|
| V-B <sub>3</sub>  | 0.17             | Nb-B <sub>3</sub> | 0.17             | Ta-B <sub>3</sub> | -0.15            |
| Cr-B <sub>3</sub> | 0.47             | Mo-B <sub>3</sub> | 0.07             | W-B <sub>3</sub>  | -0.3             |
| Mn-B <sub>3</sub> | 0.35             | Ru-B <sub>3</sub> | -0.74            | Re-B <sub>3</sub> | -0.15            |
| Fe-B <sub>3</sub> | -0.32            | Rh-B <sub>3</sub> | 0.65             | Os-B <sub>3</sub> | -0.41            |
| Co-B <sub>3</sub> | 0.48             | Pd-B <sub>3</sub> | 0.25             | Ir-B <sub>3</sub> | 0.19             |
| Ni-B <sub>3</sub> | -0.77            |                   |                  | Pt-B <sub>3</sub> | -0.15            |

Table S5. The Gibbs free energy changes (eV) of reactions in all five paths for NO<sub>2</sub>RR on M-B<sub>3</sub>.

| $\Delta G$                                     | V           | Cr          | Mn          | Fe          | Co          | Ni          |
|------------------------------------------------|-------------|-------------|-------------|-------------|-------------|-------------|
| NO <sub>2</sub> <sup>-</sup> →*NO <sub>2</sub> | -1.65       | -0.92       | -0.88       | -0.88       | -0.37       | -0.98       |
| *NO <sub>2</sub> →*HNO <sub>2</sub>            | <b>0.11</b> | 0.14        | -0.00       | -0.21       | -0.43       | <b>0.31</b> |
| *HNO <sub>2</sub> →*NO                         | -1.27       | -2.34       | -1.78       | -1.65       | -1.17       | -1.32       |
| *NO→*HNO                                       | -0.26       | <b>0.79</b> | <b>0.58</b> | <b>0.62</b> | <b>0.19</b> | 0.07        |
| *NO→*NOH                                       | 0.12        | 1.08        | 1.04        | 0.98        | 0.14        | 0.07        |
| *NOH→*N                                        | -0.24       | -1.55       | -1.30       | -1.01       | -1.94       | -4.63       |
| *HNO→*N                                        | 0.11        | -1.27       | -0.83       | -0.65       | -1.99       | -4.63       |
| *N→*NH                                         | -1.79       | -0.28       | -0.54       | -0.62       | 1.18        | 2.14        |
| *NH→*NH <sub>2</sub>                           | -0.61       | -0.80       | -1.29       | -1.30       | -1.58       | -0.17       |
| *NH <sub>2</sub> →*NH <sub>3</sub>             | -0.04       | -0.62       | -0.57       | -0.65       | -1.13       | -0.40       |
| *HNO→*HNOH                                     | 0.11        | -0.08       | -0.19       | -0.35       | -0.24       | -0.34       |
| *HNOH→*NH                                      | -1.78       | -1.46       | -1.18       | -0.91       | -0.55       | -2.15       |
| *HNO→*H <sub>2</sub> NO                        | -0.69       | -0.75       | -0.86       | -0.74       | -0.55       | -0.88       |
| *HNOH→*H <sub>2</sub> NOH                      | 0.39        | -0.09       | -0.21       | -0.08       | -0.46       | 0.21        |
| *H <sub>2</sub> NO→*H <sub>2</sub> NOH         | 1.18        | 0.59        | 0.46        | 0.30        | -0.16       | 0.75        |
| *H <sub>2</sub> NOH→*NH <sub>2</sub>           | -2.78       | -2.19       | -2.26       | -2.12       | -1.68       | -2.53       |
| $\Delta G$                                     | Nb          | Mo          | Ru          | Rh          | Pd          |             |
| NO <sub>2</sub> <sup>-</sup> →*NO <sub>2</sub> | -1.61       | -1.34       | -0.71       | 0.09        | -0.68       |             |
| *NO <sub>2</sub> →*HNO <sub>2</sub>            | <b>0.35</b> | 0.08        | -0.06       | -0.46       | <b>0.52</b> |             |
| *HNO <sub>2</sub> →*NO                         | -1.20       | -2.28       | -1.81       | -0.93       | -1.18       |             |
| *NO→*HNO                                       | -0.56       | <b>0.51</b> | <b>0.67</b> | <b>0.20</b> | -0.05       |             |
| *NO→*NOH                                       | 0.14        | 0.97        | 1.25        | 0.95        | 0.64        |             |
| *NOH→*N                                        | -0.41       | -1.62       | -0.83       | -0.15       | 0.35        |             |
| *HNO→*N                                        | 0.29        | -1.16       | -0.25       | 0.61        | 1.04        |             |
| *N→*NH                                         | -1.75       | -0.33       | -0.84       | -1.31       | -1.67       |             |
| *NH→*NH <sub>2</sub>                           | -0.85       | -0.60       | -1.25       | -1.76       | -2.07       |             |
| *NH <sub>2</sub> →*NH <sub>3</sub>             | 0.12        | -0.13       | -0.89       | -1.32       | -0.62       |             |
| *HNO→*HNOH                                     | 0.11        | 0.16        | -0.27       | -0.33       | -0.28       |             |
| *HNOH→*NH                                      | -1.58       | -1.66       | -0.82       | -0.38       | -0.35       |             |

|                                                |             |             |             |             |             |             |
|------------------------------------------------|-------------|-------------|-------------|-------------|-------------|-------------|
| *HNO→*H <sub>2</sub> NO                        | -0.83       | -0.61       | -0.31       | -0.51       | -0.78       |             |
| *HNOH→*H <sub>2</sub> NOH                      | 0.02        | 0.43        | -0.18       | -0.77       | -0.31       |             |
| *H <sub>2</sub> NO→*H <sub>2</sub> NOH         | 0.97        | 1.21        | -0.14       | -0.59       | 0.18        |             |
| *H <sub>2</sub> NOH→*NH <sub>2</sub>           | -2.45       | -2.70       | -1.88       | -1.38       | -2.11       |             |
| <b>ΔG</b>                                      | <b>Ta</b>   | <b>W</b>    | <b>Re</b>   | <b>Os</b>   | <b>Ir</b>   | <b>Pt</b>   |
| NO <sub>2</sub> <sup>-</sup> →*NO <sub>2</sub> | -1.81       | -1.69       | -1.11       | -0.89       | -0.14       | -0.79       |
| *NO <sub>2</sub> →*HNO <sub>2</sub>            | <b>0.54</b> | <b>0.39</b> | -0.14       | -0.14       | -0.34       | <b>0.59</b> |
| *HNO <sub>2</sub> →*NO                         | -1.35       | -2.14       | -2.08       | -1.82       | -1.07       | -1.27       |
| *NO→*HNO                                       | -0.64       | 0.21        | <b>0.64</b> | <b>0.57</b> | <b>0.15</b> | -0.11       |
| *NO→*NOH                                       | -0.01       | 0.64        | 0.40        | 0.99        | 0.84        | 0.61        |
| *NOH→*N                                        | -0.14       | -1.48       | -0.91       | -0.84       | -0.42       | -0.02       |
| *HNO→*N                                        | 0.49        | -1.05       | -1.15       | -0.42       | 0.27        | 0.70        |
| *N→*NH                                         | -2.07       | -0.31       | -0.55       | -0.81       | -1.24       | -1.53       |
| *NH→*NH <sub>2</sub>                           | -0.81       | -0.77       | -0.62       | -1.16       | -1.67       | -2.03       |
| *NH <sub>2</sub> →*NH <sub>3</sub>             | 0.27        | 0.17        | -0.30       | -0.60       | -0.96       | -0.24       |
| *HNO→*HNOH                                     | 0.12        | 0.28        | -0.06       | -0.17       | -0.34       | -0.35       |
| *HNOH→*NH                                      | -1.70       | -1.64       | -1.64       | -1.05       | -0.63       | -0.49       |
| *HNO→*H <sub>2</sub> NO                        | -0.73       | -0.51       | -0.51       | -0.18       | -0.48       | -0.74       |
| *HNOH→*H <sub>2</sub> NOH                      | 0.55        | 0.58        | 0.21        | -0.17       | -0.43       | -0.04       |
| *H <sub>2</sub> NO→*H <sub>2</sub> NOH         | 1.40        | 1.36        | 0.66        | -0.05       | -0.29       | 0.34        |
| *H <sub>2</sub> NOH→*NH <sub>2</sub>           | -3.06       | -2.98       | -2.48       | -2.15       | -1.86       | -2.48       |

## Reference

- [1] CRC Handbook of Chemistry and Physics, 2009–2010, 90th ed, J. Am. Chem. Soc., 131 (2009) 12862-12862, 10.1021/ja906434c, 2009/09/09.
